# Supplementary material
Source: Springer Nature journal article supplement (https://www.springermedizin.de/resource/supplementary/13601_2011_5_MOESM7_ESM.pdf/9677268)

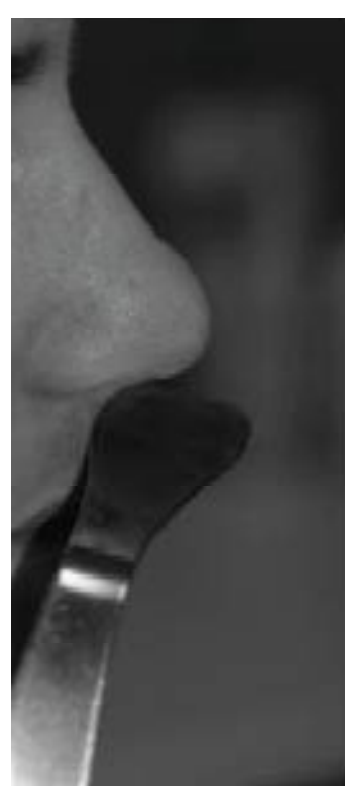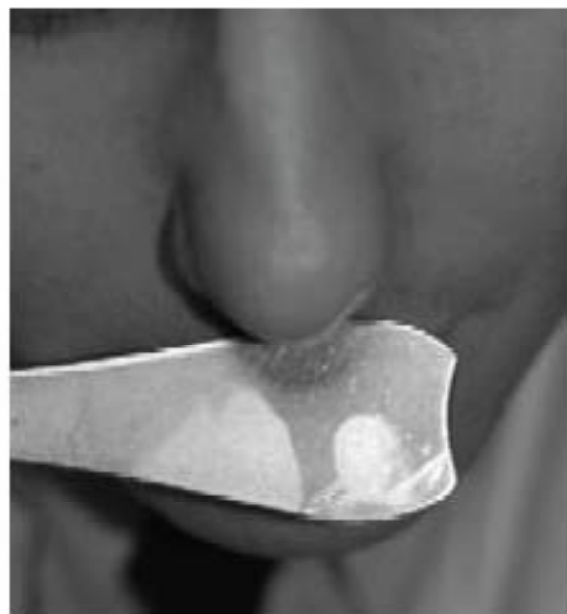

Supplement: MOESM7 [file 9677268]
